# Supplementary material for: Benzo-2,1,3-thiadiazole-based, highly dichroic fluorescent dyes for fluorescent host–guest liquid crystal displays
Source: Royal Society of Chemistry journal article supplement (doi:10.1039/b402645d), 2004-01-01
Supplement: b402645d.doc [file b402645d.doc]

**Benzo-2,1,3-thiadiazole based, highly dichroic fluorescent dyes for fluorescent host-guest liquid crystal displays**

**Xuelong Zhang,*c* Hideki Gorohmaru,*b* Masami Kadowaki,*b* Takako Kobayashi,*b*　Tsutomu Ishi-i,*a* Thies Thiemann,*a* and Shuntaro Mataka**a***

*a Institute for Materials Chemistry and Engineering, Kyushu University, 6-1, Kasuga-koh-en, Kasuga-shi, 816-8580, Japan. Fax: +81-92-583-7811; E-mail: mataka@cm.kyushu-u.ac.jp*

*b Mitsubishi Chemical Corporation, 1000 Kamoshida, Aoba-ku, Yokohama, 227-8502, Japan*

*c Department of Molecular and Material Sciences, Graduate School of Engineering Sciences, Kyushu University, 6-1, Kasuga-koh-en, Kasuga-shi, Fukuoka 816-8580, Japan*

# Supplementary Information

**General.** Melting points were measured on a Yanaco microscopic hotstage and are uncorrected. Infrared spectra were recorded on a JASCO FT/IR-470 plus Fourier Transform Infrared Spectrometer and measured as KBr pellets. 1H NMR spectra were determined in CDCl3, CD2Cl2, or DMSO-*d*6 using a JEOL EX-270 spectrometer (270 MHz and chemical shifts (**) are reported in ppm downfield of tetramethylsilane (TMS). The coupling constants (*J*) are reported in Hz. Mass spectra were recorded with a JEOL JMS-70 mass spectrometer either in EI-mode at 70 eV using a direct inlet system or in FAB-mode with *m*-nitrobenzyl alcohol as the matrix. UV/Vis spectra were measured on a JASCO V-570 spectrophotometer in a 1 cm wide cell. Fluorescence spectra were measured on a HITACHI F-4500 fluorescence spectrophotometer in a 1 cm wide cell. Analytical TLC was carried out on silica gel coated on aluminum foil (Merck 60 F254). Column chromatography was carried out on silica gel (Wako C-300 or KANTO 60N).

**Synthesis of materials.** Trimethylborate (>97%, TCI), *p*-formylphenylboronic acid (**5**) and Pd(PPh3)4 (TCI) were used as received. The *p*-alkoxyphenylboronic acids **3a** - **3g** were prepared from the corresponding *p*-alkoxyaryl bromides (all TCI) by lithiation and quenching with trimethylborate according to literature procedures.[11]

**4,7-Bis(*p*-methoxyphenyl)-2,1,3-benzothiadiazole - General procedure for the preparation of 4,7-bis(*p*-alkoxylphenyl)-2,1,3-benzothiadiazoles 4a – 4g.** To a mixture of **2** (2.05 g, 7.0 mmol) and tetrakis(triphenylphosphine)palladium ｢Pd(PPh3)4｣ (485 mg, 0.42 mmol) in toluene (100 cm3) was added a solution of 4-methoxyphenylboronic acid (2.44 g, 16.1 mmol) in ethanol (20 cm3) and aqueous 2 M sodium carbonate solution (50 cm3) at 60 oC under an argon atmosphere. After the mixture was heated for 24 h at 85°C, the reaction mixture was poured into water (200 cm3) and extracted with toluene (200 cm3 x 3). The organic layer was washed with brine (100 cm3 x 2), dried over anhydrous magnesium sulfate, and evaporated in vacuo to dryness. The residue was purified by chromatography on silica gel (WAKO C-300, eluant: toluene) and recrystallized from chloroform/n-hexane to give **4a** in 71% yield (1.71 g, 4.97 mmol) as a green powder (yellow needles from ethanol), mp 209-210°C (Calcd. for C20H16N2O2S: C, 68.94; H, 4.63; N, 8.04. Found: C, 68.95; H, 4.64; N, 8.03). IR (KBr, cm-1) 3012, 2832, 1607, 1517, 1478, 1282, 1250, 1179, 1118, 1029. **H (CDCl3) 3.90 (s, 6 H, CH3), 7.09 (d, *J* = 8.9 Hz, 4 H, ArH), 7.72 (s, 2 H, ArH), 7.93 (d, *J* = 8.9 Hz, 4 H, ArH). EI-MS 348 (M+).

**4,7-Bis(*p*-ethoxyphenyl)-2,1,3-benzothiadiazole (4b)**. - **4b** was prepared from **2** (1.18 g, 4.0 mmol) and *p*-ethoxyphenylboronic acid (1.66 g, 10.0 mmol) according to the method used for **4a**, and was obtained in 60% yield (902 mg, 2.4 mmol) as yellow needles (ethanol), mp: 216-217 ℃ (Calcd. for C22H20N2O2S: C, 70.19; H, 5.35; N, 7.44 Found: C, 70.10; H, 5.39; N, 7.41). IR (KBr, cm-1) 2980, 1607, 1518, 1474, 1393, 1279, 1248, 1179, 1118, 1045. **H (CDCl3) 1.47 (t, *J* = 6.9 Hz, 6 H, CH3), 4.12 (q, *J* = 6.9 Hz , 4 H, CH2), 7.06 (d, *J* = 8.7 Hz, 4 H, ArH), 7.71 (s, 2 H, ArH), 7.91 (d, *J* = 8.7 Hz, 4 H, ArH). EI-MS 376(M+).

**4,7-Bis(*p*-propoxyphenyl)-2,1,3-benzothiadiazole (4c)**. **4c** was prepared from **2** (1.18 g, 4.0 mmol) and *p*-propoxyphenylboronic acid (1.80 g, 10.0 mmol) according to the method used for **4a**, and was obtained in 73% yield (1.18 g, 2.9 mmol) as yellow needles (ethanol), mp: 138-139 ℃ (Calcd for C24H24N2O2S: C, 71.26; H, 5.98; N, 6.93. Found: C, 71.10; H, 6.00; N, 6.87). IR (KBr, cm-1) 2958, 1606, 1517, 1468, 1392, 1344, 1311, 1277. 1240, 1181, 1119, 1066. **H (CDCl3) 1.07 (t, *J* = 7.3 Hz, 6 H, CH3), 1.87 (m, 4 H, CH2), 4.01 (t, *J* = 6.6 Hz , 4 H, OCH2), 7.09 (d, *J* = 8.6 Hz, 4 H, ArH), 7.70 (s, 2 H, ArH), 7.90 (d, *J* = 8.6 Hz, 4 H, ArH). EI-MS 404 (M+).

**4,7-Bis(*p*-butoxyphenyl)-2,1,3-benzothiadiazole (4d)**. **4d** was prepared from **2** (1.18 g, 4.0 mmol) and *p*-butoxyphenylboronic acid (1.94 g, 10.0 mmol) according to the method used for **4a**, and was obtained in 86% yield (1.49 g, 3.4 mmol) as yellow needles (ethanol), mp: 118-119 ℃ (Calcd for C26H28N2O2S: C, 72.19; H, 6.52; N, 6.48. Found: C, 72.07; H, 6.54; N, 6.37). IR (KBr, cm-1) 2956, 1610, 1520, 1481, 1301, 1282, 1256, 1179, 1118, 1068, 1025. **H (CDCl3) 1.00 (t, *J* = 7.4 Hz, 6 H, CH3), 1.50-1.60 (m, 4 H, CH2), 1.82-1.87 (m, 4 H, CH2), 4.06 (t, *J* = 6.6 Hz , 4 H, OCH2), 7.07 (d, *J* = 8.9 Hz, 4 H, ArH), 7.72 (s, 2 H, ArH), 7.91 (d, *J* = 8.9 Hz, 4 H, ArH). EI-MS: 432 (M+).

**4,7-Bis(*p*-pentyloxyphenyl)-2,1,3-benzothiadiazole (4e)**. **4e** was prepared from **2** (1.18 g, 4.0 mmol) and *p*-pentyloxyphenylboronic acid (2.08 g, 10.0 mmol) according to the method used for **4a**, and was obtained in 73% yield (1.34 g, 2.9 mmol) as yellow needles (hexane), mp: 109-110 ℃ (Calcd for C28H32N2O2S: C, 73.01; H, 7.00; N, 6.08. Found: C, 73.01; H, 6.99; N, 6.03). IR (KBr, cm-1) 2936, 1607, 1517, 1472, 1390, 1343, 1309, 1279, 1251, 1180, 1120, 1050, 1019. **H (CDCl3) 0.95 (t, *J* = 6.9 Hz, 6 H, CH3), 1.37-1.48 (m, 8 H, CH2), 1.78-1.90 (m, 4 H, CH2), 4.05 (t, *J* = 6.4, 4 H, OCH2), 7.06 (d, *J* = 8.6 Hz, 4 H, ArH), 7.71 (s, 2 H, ArH), 7.91 (d, *J* = 8.6 Hz, 4H, ArH). EI-MS: 460 (M+).

**4,7-Bis(*p*-hexyloxyphenyl)-2,1,3-benzothiadiazole (4f). 4f** was prepared from **2** (1.18 g, 4.0 mmol) and *p*-hexyloxyphenylboronic acid (2.22 g, 10.0 mmol) according to the method used for **4a**, and was obtained in 82% yield (1.60 g, 3.3 mmol) as yellow needles (hexane), mp: 96-97 ℃ (Calcd for C30H36N2O2S: C, 73.73; H, 7.43; N, 5.73. Found: C, 73.71; H, 7.36; N, 5.70). IR (KBr, cm-1) 2932 , 1606, 1517, 1475, 1390, 1279, 1250, 1180, 1120, 1027. **H (CDCl3) δ 0.92 (t, *J* = 7.1 Hz, 6 H, CH3), 1.29-1.52 (m, 12 H, CH2), 1.78-1.88 (m, 4 H, CH2), 4.05 (t, *J* = 6.6 Hz, 4 H, OCH2), 7.07 (d, *J* = 8.6 Hz, 4 H, ArH), 7.71 (s, 2 H, ArH), 7.91 (d, *J* = 8.6 Hz, 4 H, ArH). EI-MS 488 (M+).

**4,7-Bis(*p*-octyloxyphenyl)-2,1,3-benzothiadiazole (4g).** **4g** was prepared from **2** (1.18 g, 4.0 mmol) and *p*-octyloxyphenylboronic acid (2.50 g, 10.0 mmol) according to the method used for **4a**, and was obtained in 66% yield (1.44 g, 2.6 mmol) as yellow needles (hexane), mp: 152-153 ℃ (Calcd for C28H19N3O3S2: C, 74.96; H, 8.14; N, 5.14. Found: C, 74.97; H, 8.11; N, 5.12). IR (KBr) 2922, 2854, 1606, 1517, 1474, 1277, 1252, 1181, 1028, 998, 820. **H (CDCl3) 1.30 (t, *J* = 7.6 Hz, 6 H, CH3), 1.51-1.63 (m, 20 H, CH2), 1.82 (tt, *J* = 6.6, 6.9 Hz, 4 H, CH2), 4.05 (t, *J* = 6.6 Hz, 4 H, OCH2), 7.07 (d, *J* = 8.9 Hz, 4H), 7.12 (s, 2 H, ArH), 7.91(d, *J* = 8.9 Hz, 4 H, ArH). EI-MS 544 (M+).

**4,7-Bis(*p*-formylphenyl)-2,1,3-benzothiadiazole (6).** To a mixture of **2** (2.23 g, 7.6 mmol), tetrakis(triphenylphosphine)palladium (0) (152 mg, 132 mmol) in toluene (80 cm3), and aq. 2 M sodium carbonate (40 cm3) was added dropwise a solution of *p*-formylphenylboronic acid (**5**) (1.14 g, 7.6 mmol) in degassed ethanol (20 cm3) at room temperature and under an argon atmosphere. After the mixture was heated at reflux for 24 h, it was poured into water (200 cm3) and extracted with chloroform (200 cm3 x 3). The organic layer was washed with brine (100 cm3 x 2), dried over anhydrous MgSO4, and evaporated in *vacuo* to dryness. The residue was purified by column chromatography on silica gel (ethyl acetate/dichloromethane/*n*-hexane = 1:4:4 [v/v/v]) to give **6** in 52% yield (1.37 g, 4.0 mmol) as a yellow powder (toluene), mp >360 ℃ (decomp.) (Calcd for C20H12N2O2S: C, 69.75; H, 3.61; N, 8.13. Found: C, 69.53; H, 3.48; N, 8.08). IR (KBr, cm-1) 2924, 1701 (VC=O), 1604, 1484, 1390, 1310, 1263, 1213, 1165, 1116. 1H NMR (CDCl3) **H 7.92 (s, 2 H, ArH), 8.08 (d, *J* = 8.3 Hz, 4 H, ArH), 8.18 (d, *J* = 8.3 Hz, 4H, ArH), 10.13 (s, 2 H, CHO). FAB-MS 345 [(M++1)+].

**4,7-Bis(*p*-hydroxymethylphenyl)-2,1,3-benzothiadiazole (7).**To a solution of **6** (190 mg, 0.55 mmol) in methanol (10 cm3) was added sodium tetrahydroborate (42 mg, 1.1 mmol). After the mixture was stirred for 5 h at room temperature, the reaction mixture was poured into water (50 cm3). The precipitate formed was collected by filtration and washed with methanol to give **7** in 87% yield (167 mg, 0.48 mmol) as a yellow powder, mp: 223-224 oC (Calcd for C20H16N2O2S: C, 68.94; H, 4.63; N, 8.04. Found: C, 69.07; H, 4.59; N, 8.10). IR (KBr) max 3372 (OH), 2874, 1555, 1479, 1417, 1211, 1115, 1036, 1018 cm-1. **H (CDCl3) 4.80 (d, *J* = 6.7 Hz, 4 H, 2CH2), 7.57 (d, *J* = 7.9 Hz, 4 H, ArH), 7.80 (s, 2 H, ArH), 7.98 (d, *J* = 7.9 Hz, 4 H, ArH). EI-MS (positive)348 (M+).

**4,7-Bis(*p*-methoxymethylphenyl)-2,1,3-benzothiadiazole (8a) - General procedure for the preparation of 4,7-bis(*p*-alkoxymethylphenyl)-2,1,3-benzothiadiazoles (8a – 8e).** To a suspension of **7** (348 mg, 1.0 mmol) and potassium hydroxide (448 mg, 8.0 mmol) in dry DMSO (20 cm3) was added methyl iodide (564 mg, 4.0 mmol) at room temperature under an argon atmosphere and the resulting mixture stirred for 4 h at rt. The reaction mixture was poured into water (80 cm3) and extracted with dichloromethane/*n*-hexane (2:1, v/v) (30 cm3 x 3). The combined organic phase was washed with water (20 cm3 x 2), dried over anhydrous MgSO4 and evaporated in vacuo to dryness. The residue was purified by column chromatography on silica gel (WAKO C-300, eluant: ethyl acetate/dichloromethane/*n*-hexane 1:4:4 [v/v/v]) and recrystallized from *n*-hexane to give **8a** in 90% yield (338 mg, 0.9 mmol) as yellow needles (chloroform/ethanol = 1:2 [v/v]), mp: 125 - 127 ℃(Calcd for C22H20N2O2S: C, 70.19; H, 5.35; N, 7.44. Found: C, 70.17; H, 5.37; N, 7.50). IR (KBr, cm-1) 2916, 2818, 1574, 1474, 1382, 1193, 1102, 1087, 1019; **H (CDCl3) 3.45 (s, 6 H, 2CH3), 4.57 (s, 4 H, 2CH2), 7.53 (d, *J* = 8.2 Hz, 4 H, ArH), 7.79 (s, 2 H, ArH), 7.96 (d, *J* = 8.2 Hz, 4 H, ArH). EI-MS 376 (M+).

**4,7-Bis(*p*-ethoxymethylphenyl)-2,1,3-benzothiadiazole (8b).** **8b** was obtained from **7** (348 mg, 1.0 mmol) and bromoethane (436 mg, 4.0 mmol), analogous to the preparation of **8a** (reaction time 5h), in 87% yield (351 mg, 0.87 mmol) as yellow needles (from chloroform/ethanol = 1:2 (v/v)), mp 73.7 – 74.2 ℃ (Calcd for C24H24N2O2S: C, 71.26; H, 5.98; N, 6.93. Found: C, 71.11; H, 5.96; N, 7.06). IR (KBr, cm-1) 2972, 2928, 2854, 1639, 1548, 1517, 1480, 1410, 1374, 1350, 1308, 1214, 1171, 1103, 1018. **H (CDCl3) 1.28 (t, *J* = 6.9 Hz, 6 H, 2CH3), 3.60 (q, *J* = 6.9 Hz, 4 H, 2CH2), 4.61 (s, 4 H, CH2), 7.92 (d, *J* = 9.2 Hz, 4 H, ArH), 7.97 (s, 2 H, ArH), 8.07 (d, *J* = 9.2 Hz, 4 H, ArH). EI-MS 404 (M+).

**4,7-Bis(*p*-butoxymethylphenyl)-2,1,3-benzothiadiazole (8c).****8c** was obtained from **7** (348 mg, 1.0 mmol) and 1-bromobutane (548 mg, 4.0 mmol), analogous to the preparation of **8a** (reaction time 3h), in 54% yield (248 mg, 0.54 mmol) as yellow needles (chloroform/ethanol = 1/2 (v/v)), mp: 56.4 – 57.1 ℃ (Calcd for C28H32N2O2S: C, 72.76; H, 6.98; N, 6.03. Found: C, 73.01; H, 7.00; N, 6.08). IR (KBr, cm-1) 2932, 2852, 2356, 1554, 1481, 1467, 1416, 1363, 1304, 1264, 1211, 1120, 1099, 1016. **H (CDCl3) 0.95 (t, *J* = 7.3 Hz, 6 H, 2CH3), 1.44 (qt, *J* = 7.3 Hz, 7.9 Hz, 4 H, 2CH2), 1.61 (tt, *J* = 6.4 Hz, 7.9 Hz, 4 H, 2CH2), 3.54 (t, *J* = 6.4 Hz, 4 H, 2CH2), 4.61 (s, 4 H, 2CH2), 7.52 (d, *J* = 7.9 Hz, 4 H, ArH), 7.78 (s, 2 H, ArH), 7.94 (d, *J* = 7.9 Hz, 4 H, ArH). EI-MS 460 (M+).

**4,7-Bis(*p*-pentoxymethylphenyl)-2,1,3-benzothiadiazole (8d).** **8d** was obtained from **7** (348 mg, 1.0 mmol) and 1-bromopentane (604 mg, 4.0 mmol), analogous to the preparation (reaction time 7h) of **8a** in 53% yield (259 mg, 0.53 mmol) as yellow needles (chloroform/ethane = 1:2 [v/v]); mp: 39.5 – 40.3 ℃ (Calcd for C30H36N2O2S: C, 73.25; H, 7.39; N, 5.70. Found: C, 73.53; H, 7.43; N, 5.73). IR (KBr, cm-1) 2932, 2852, 2356, 1554, 1481, 1467, 1416, 1363, 1304, 1264, 1211, 1120, 1099, 1016; **H (CDCl3) 0.92 (t, *J* = 6.9 Hz, 6 H, CH3), 1.38-1.46 (m, 8 H, CH2), 1.65-1.72 (m, 4 H, CH2), 3.53 (t, *J* = 6.8 Hz, 4 H, CH2), 4.61 (s, 4 H, CH2), 7.53 (d, *J* = 8.2 Hz, 4 H, ArH), 7.79 (s, 2 H, ArH), 7.95 (d, *J* = 8.2 Hz, 4 H, ArH); EI-MS, 488 *m/z* (M)+.

**4,7-Bis(*p*-decanyloxymethylphenyl)-2,1,3-benzothiadiazole (8e).** **8e** was obtained from **7** (348 mg, 1.0 mmol) and 1-bromodecane (884 mg, 4.0 mmol), analogous to the preparation of **8a** (reaction time 5h), in 44% yield (276 mg, 0.44 mmol) as a yellow powder (chloroform/ethanol = 1:2 [v/v]); mp: 71.8 - 73.4 ℃ (Calcd for C40H56N2O2S: C, 76.39; H, 8.97; N, 4.45. Found: C, 76.12; H, 9.01; N, 4.36). IR (KBr, cm-1) 2920, 2850, 1468, 1365, 1123, 1096, 1018, 889, 847, 812 cm-1. **H (CDCl3) 0.88 (t, *J* = 6.6 Hz, 6 H, CH3), 1.26-1.39 (m, 32 H, CH2), 3.53 (t, *J* = 6.6 Hz, 4 H, CH2), 4.60 (s, 4 H, CH2), 7.53 (d, *J* = 8.2 Hz, 4 H, ArH), 7.78 (s, 2 H, ArH), 7.95 (d, *J* = 8.2 Hz, 4 H, ArH). EI-MS 628 (M+).

**4,7-Bis(*p*-carboxyphenyl)-2,1,3-benzothiadiazole (10).** To a mixture of **2** (0.81 g, 2.7 mmol) in acetonitrile (60 cm3) and aq. 2 M sodium carbonate solution (30 cm3) were added *p*-carboxyphenylboronic acid (**9**) (1.00 g, 6.03 mmol)[17] and tetrakis(triphenylphosphine) palladium (0) (55 mg, 0.05 mmol) under an argon atmosphere. After the mixture was heated under reflux for 12 h, the reaction mixture was poured into an aq. sodium hydroxide solution (wt-7%, 700 cm3) to completely dissolve the product. After filtration, the filtrate was added to an aq. 1.2 N HCl solution which was kept at pH < 3.0 and was cooled to 0 ℃. The precipitate formed was collected to give **10** in 77% yield (0.79 g) as a yellow powder (toluene), mp: 376℃-378℃ (Calcd for C20H12N2O4S: C, 63.82; H, 3.21; N, 7.44. Found: C, 64.11; H, 3.42; N, 7.47). IR (KBr, cm-1) 3450, 2990, 2666, 2544, 1693 (VC=O), 1608, 1570, 1507, 1424, 1285, 1183, 1111, 1018. **H 1(CDCl3) 8.04 (s, 2 H, ArH), 8.11 (d, *J* = 8.6 Hz, 4 H, ArH), 8.27 (d, *J* = 8.6 Hz, 4 H, ArH), 13.31 (s, 2 H, COOH). FAB-MS 377 [(M+1)+].

**4,7-Bis(*p*-chlorocarbonylphenyl)-2,1,3-benzothiadiazole (11).** To a mixture of **10** (4.70 g, 160 mmol) in 1,2-dichloroethane (90 cm3) was added dropwise a solution of thionyl chloride (19.0 g, 160 mmol) in 1,2-dichloroethane (30 cm3) at room temperature under an argon atmosphere. After the mixture was heated under reflux for 3 h, the reaction mixture was cooled to rt. The precipitate formed was collected by filtration and washed with 1,2-dichloroethane (40 cm3) to give **11** in 81% yield (5.30 g, 129 mmol) as a yellow solid. Without further purification, **11** was used in the next reaction: IR (KBr) 2977, 1685 (VC=O), 1604, 1421, 1294, 1177 cm-1. **H (DMSO-*d*6) 7.93 (s, 2 H, ArH), 8.15 (d, *J* = 8.6 Hz, 4 H, ArH), 8.31 (d, *J* = 8.6 Hz, 4 H, ArH).

##### 4,7-Bis(*p*-methoxycarbonylphenyl)-2,1,3-benzothiadiazole (12a) - General procedure for the preparation of 4,7-bis-(*p*-alkoxycarbonylphenyl)-2,1,3-benzothiadiazole (12a-d) procedure. To a mixture of potassium hydroxide (440 mg, 8 mmol) in methanol (10 cm3) was added 11 (413 mg, 1.0 mmol). Then, the mixture was stirred at room temperature for 3 h. The precipitate formed was collected by filtration and washed with methanol (30 cm3). The precipitate was purified by column chromatography on silica gel (WAKO C-300, eluant: ethyl acetate/chloroform/*n*-hexane 1:5:4 [v/v/v]) and recrystallized from ethanol to give 12a in 97% yield (392 mg, 0.97 mmol) as a yellow powder (chloroform/ethanol = 1:1 (v/v)); mp: 243 – 244 ℃ (Calcd for C22H16N2O4S: C, 65.33; H, 3.99; N, 6.93. Found: C, 65.26; H, 3.98; N, 6.98). IR (KBr, cm-1) 2954, 1719 (VC=O), 1611, 1555, 1433, 1289, 1185, 1110, 1019. **H (CDCl3) 3.98 (s, 6 H, 2 COOMe), 7.87 (s, 2 H, ArH), 8.07 (d, *J* = 8.6 Hz, 4 H, ArH), 8.20 (d, *J* = 8.6 Hz, 4 H, ArH). EI-MS404 (M+).

##### 4,7-Bis(*p*-ethoxycarbonylphenyl)-2,1,3-benzothiadiazole (12b). Analogous to the preparation of 12a, 12b was obtained in 95% yield (410 mg, 0.95 mmol) from 11 (413 mg, 1.0 mmol) and ethanol (10 cm3) as a yellow powder (chloroform/ethanol = 1:1 [v/v]), mp: 150 - 151 ℃(Calcd for C24H20N2O4S: C, 66.65; H, 4.66; N, 6.48. Found: C, 66.40; H, 4.68; N, 6.49). IR (KBr, cm-1) 2926, 1719 (VC=O), 1613, 1417, 1367, 1283, 1186, 1128, 1110, 1027. **H (CDCl3) 1.44 (t, *J* = 7.1 Hz, 6 H, 2 CH3), 4.44 (q, *J* = 7.1 Hz, 4 H, 2 CH2), 7.88 (s, 2 H, ArH), 8.08 (d, *J* = 8.2 Hz, 4 H, ArH), 8.22 (d, *J* = 8.2 Hz, 4 H, ArH). EI-MS 432 (M+).

**4,7-Bis(*p*-heptoxycarbonylphenyl)-2,1,3-benzothiadiazole (12c).** Analogous to the preparation of **12a**, **12c** was obtained in 23% yield (132 mg, 0.23 mmol) from **11** (413 mg, 1.0 mmol) and *n*-heptanol (5.0 cm3) as a yellow powder, mp: 89 – 90 ℃ (*n*-hexane) (Calcd for C34H40N2O4S: C, 71.30; H, 7.04; N, 4.89. Found: C, 71.22; H, 7.01; N4.85). IR (KBr, cm-1) 2925, 1713 (VC=O), 1285, 1108; **H (CDCl3) 0.91 (t, *J* = 6.6 Hz, 6 H, CH3), 1.25-1.48 (m, 16 H, CH2), 1.81 (tt, *J* = 6.6 Hz, 7.9 Hz, 4 H, CH2), 4.37 (t, *J* = 6.6 Hz, 4 H, CH2), 7.87 (s, 2 H, ArH), 8.06 (d, *J* = 8.6 Hz, 4 H, ArH), 8.22 (d, *J* = 8.6 Hz, 4 H, ArH). FAB-MS 573 [(M+1)+].

**4,7-Bis(*p*-octoxycarbonylphenyl)-2,1,3-benzothiadiazole (12d).** Analogous to the preparation of **12a**, **12d** was obtained in 18% yield (108 mg, 0.18 mmol) from **11** (413 mg, 1.0 mmol) and n-octanol (5.0 cm3) as a yellow powder (n-hexane); mp 85 - 86 ℃(Calcd for C36H44N2O4S: C, 71.97; H, 7.38; N, 4.66. Found: C, 71.99; H, 7.38; N, 4.66). IR (KBr, cm-1) 2960, 2924, 2854, 1715 (VC=O), 1612, 1476, 1416, 1287, 1188, 1112, 1020. **H (CDCl3) δ 0.89 (t, *J* = 6.6 Hz, 6 H, 2 CH3), 1.30-1.56 (m, 20 H, 10 CH2), 1.81 (tt, *J* = 6.6, 7.6 Hz, 4 H, 2 CH2), 4.37 (t, *J* = 6.6 Hz, 4 H, 2 CH2), 7.87 (s, 2 H, ArH), 8.05 (d, *J* = 8.3 Hz, 4 H, ArH), 8.23 (d, *J* = 8.3 Hz, 4 H, ArH). FAB-MS 601 [(M++1)+].
